# Supplementary material
Source: Research Square preprint supplement (doi:10.21203/rs.3.rs-9148870/v1)
Supplement: Supplementary file 1 [file eabec638c077b6878b19f376.pdf]

## Supplementary Materials

| $n$                    | 2     | 3     | 4     | 5     | 6     | 7     | 8     | 9     | 10    |
|------------------------|-------|-------|-------|-------|-------|-------|-------|-------|-------|
| $S_{0-0}^{\text{tol}}$ | 2.439 | 2.037 | 1.800 | 1.660 | 1.575 | 1.521 | 1.498 | 1.475 | 1.466 |
| $S_{0-1}^{\text{tol}}$ | 2.856 | 2.420 | 2.146 | 1.996 | 1.904 | 1.836 | 1.793 | 1.762 | 1.739 |
| $S_{0-0}^{\text{vac}}$ | 2.673 | 2.239 | 1.985 | 1.825 | 1.720 | 1.649 | 1.602 | 1.569 | 1.547 |
| $S_{0-1}^{\text{vac}}$ | 2.989 | 2.541 | 2.267 | 2.101 | 1.991 | 1.911 | 1.859 | 1.821 | 1.792 |

Table S1: Excitation energies as a function of the conjugation length  $n$  obtained from quantum-chemical calculations.  $S_{0-0}$  and  $S_{0-1}$  denote vibrationally relaxed and vertical excitation energies, respectively. Results in toluene and in vacuum are shown. All energies are given in eV.

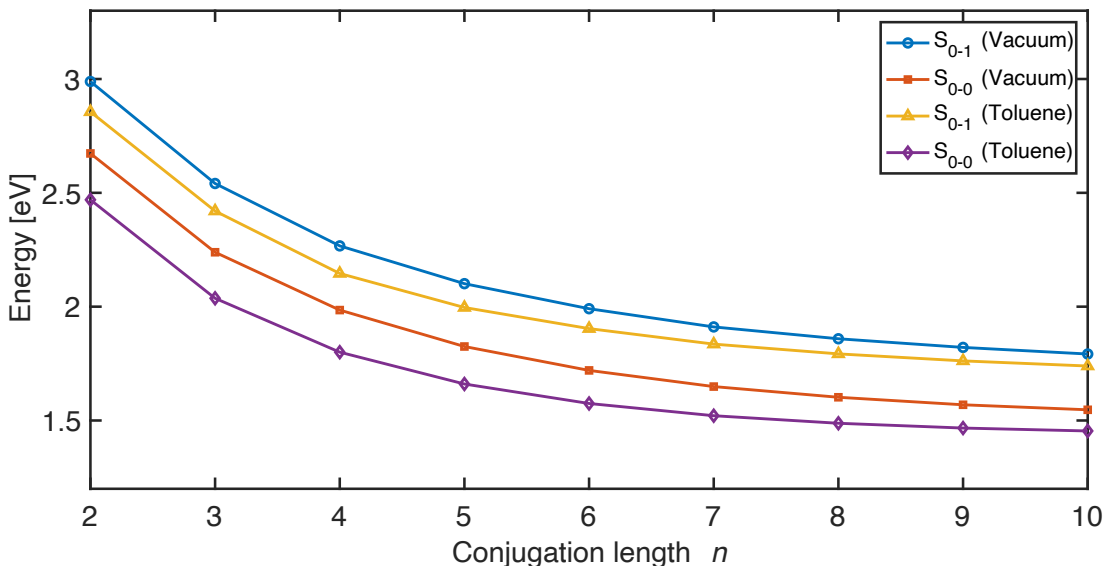

Figure S1: Conjugation-length dependence of the electronic excitation energies for MEH-PPV chromophores. The data points are taken from Table S1 and show both vertical ( $S_{0-1}$ ) and vibrationally relaxed ( $S_{0-0}$ ) excitation energies as functions of the conjugation length  $n$ . Results obtained in vacuum and in toluene are shown for comparison, illustrating the systematic stabilization of excitation energies with increasing conjugation length and the solvent-induced energy shifts.
